# Supplementary material
Source: Research Square preprint supplement (doi:10.21203/rs.3.rs-10249546/v1)
Supplement: Supplementary file 1 [file d07025cceb6c9a9f8f802634.docx]

**Highlights**

Theoretical Analysis of the Energy Cascade in Quantum Turbulence: From Richardson–Kolmogorov Eddies to Kelvin Waves

- Unifies the quantum turbulence energy cascade into a single scale-by-scale account, from macroscopic Richardson–Kolmogorov eddies to vortex-core-scale dissipation.
- Provides a critical, side-by-side comparison of the Kozik–Svistunov (six-wave) and L’vov–Nazarenko (four-wave) theories of the Kelvin-wave cascade, including the unresolved tilt-symmetry dispute.
- Identifies and tabulates open problems in the L’vov–Nazarenko–Rudenko bottleneck, reconnection universality, and multi-scale simulation.
- Surveys modern experimental techniques — including nanomechanical resonator spectroscopy — that are beginning to test these theories directly, including a recent direct observation of roton emission from a single quantized vortex.
- Compares the Gross–Pitaevskii and vortex filament simulation frameworks and proposes concrete future directions, including hybrid multi-scale simulation schemes.
